# Supplementary material for: Structural basis of collagen glucosyltransferase function and its serendipitous role in kojibiose synthesis
Source: Research Square preprint supplement (doi:10.21203/rs.3.rs-5850681/v1), 2025-01-28
Supplement: Supplementary file 1 [file 1e84dadfd7593796517a5029.docx]

Table S1: Crystallographic table for data collection and refinement statistics. Statistics for the highest resolution shell are given in parentheses.

|  | R699 |
| --- | --- |
| **Data collection** |  |
| PDB Code | 9DYT |
| Wavelength [Å] | 1.0000 |
| Space group | P 1 21 1 |
| Unit cell [Å; °] | 69.821 121.696 72.690; 90.000 118.589 90.000 |
| Resolution [Å] | 61.31-1.80 (1.83-1.80) |
| Rmerge | 0.079 (0.908) |
| CC1/2 | 0.998 (0.864) |
| Mean I/sigma [I] | 10.7 (1.7) |
| Unique reflections | 97211 (4789) |
| Completeness [%] | 98.8 (99.3) |
| Multiplicity | 6.8 (6.9) |
| **Refinement** |  |
| Number of reflections | 97161 |
| Rwork | 0.1895 |
| Rfree | 0.2199 |
| Number of non-hydrogen atoms | 7789 |
| Protein | 7281 |
| Ion | 2 |
| Water | 506 |
| B-factors | 33.37 |
| Protein | 33.4 |
| Ion | 24.01 |
| Water | 37.09 |
| RMS |  |
| Bond lengths | 0.0091 |
| Bond angles | 1.63 |
| Ramachandran |  |
| Favored [%] | 96.99 |
| Allowed [%] | 2.77 |
| Outliers [%] | 0.23 |
| Rotamer outliers [%] | 1.11 |
| Clashscore | 1.87 |

Values in parentheses: highest-resolution shell

Table S2: Crystallographic table for data collection and refinement statistics. Statistics for the highest resolution shell are given in parentheses.

|  | R699 |
| --- | --- |
| **Data collection** |  |
| PDB Code | 9DZS |
| Wavelength [Å] | 1.0000 |
| Space group | C 1 2 1 |
| Unit cell [Å; °] | 118.041 71.481 72.626; 90.000 123.178 90.000 |
| Resolution [Å] | 60.79-1.75 (1.78-1.75) |
| Rmerge | 0.083 (0.491) |
| CC1/2 | 0.998 (0.921) |
| Mean I/sigma [I] | 10.9 (2.7) |
| Unique reflections | 349711 (18358) |
| Completeness [%] | 99.3 (98.5) |
| Multiplicity | 6.9 (6.6) |
| **Refinement** |  |
| Number of reflections | 50656 |
| Rwork | 0.1706 |
| Rfree | 0.1953 |
| Number of non-hydrogen atoms | 3967 |
| Protein | 3638 |
| Ligand/ion | 38 |
| Water | 291 |
| B-factors | 20.74 |
| Protein | 20.02 |
| Ligand | 16.19 |
| Ion | 11.56 |
| Water | 30.33 |
| RMS |  |
| Bond lengths | 0.0103 |
| Bond angles | 1.76 |
| Ramachandran |  |
| Favored [%] | 97.24 |
| Allowed [%] | 2.30 |
| Outliers [%] | 0.46 |
| Rotamer outliers [%] | 2.23 |
| Clashscore | 2.20 |

Values in parentheses: highest-resolution shell

Table S3: Crystallographic table for data collection and refinement statistics. Statistics for the highest resolution shell are given in parentheses.

|  | R699 |
| --- | --- |
| **Data collection** |  |
| PDB Code | 9E92 |
| Wavelength [Å] | 1.0000 |
| Space group | P 1 21 1 |
| Unit cell [Å; °] | 69.153 124.998 72.757; 90.00 118.30 90.00 |
| Resolution [Å] | 62.50-1.50 (1.52-1.50) |
| Rmerge | 0.059 (0.602) |
| CC1/2 | 0.998 (0.857) |
| Mean I/sigma [I] | 13.3 (1.8) |
| Unique reflections | 171464 (7911) |
| Completeness [%] | 98.4 (91.5) |
| Multiplicity | 6.8 (6.3) |
| **Refinement** |  |
| Number of reflections | 171272 |
| Rwork | 0.1657 |
| Rfree | 0.1890 |
| Number of non-hydrogen atoms | 8527 |
| Protein | 7497 |
| Ligand/ion | 145 |
| Water | 883 |
| B-factors | 20.48 |
| Protein | 20.67 |
| Ligand | 21.41 |
| Ion | 12.7 |
| Water | 30.88 |
| RMS |  |
| Bond lengths | 0.0127 |
| Bond angles | 1.82 |
| Ramachandran |  |
| Favored [%] | 97.39 |
| Allowed [%] | 2.16 |
| Outliers [%] | 0.45 |
| Rotamer outliers [%] | 0.48 |
| Clashscore | 1.45 |

Values in parentheses: highest-resolution shell
